# Supplementary material for: Dose-dependent effect of cannabinoid WIN-55,212-2 on myelin repair following a demyelinating insult
Source: Springer Nature journal article supplement (doi:10.1038/s41598-019-57290-1), 2020-01-17
Supplement: MOESM2 [file 41598_2019_57290_MOESM2_ESM.pdf]

## Dose-dependent effect of cannabinoid WIN-55,212-2 on myelin repair following a demyelinating insult

J. Tomas-Roig, HY. Agbemenyah, N. Celarain, E. Quintana, LI. Ramió-Torrentà and U. Havemann-Reinecke

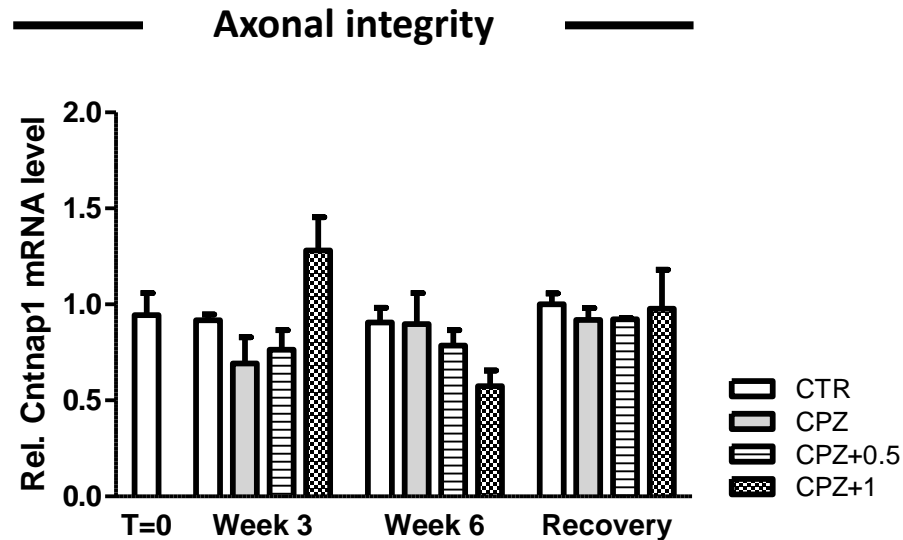

**Fig. S2.** Relative mRNA expression for a marker of axonal integrity. We did not find significant differences in axonal integrity throughout the experimental period as indicated by the expression of the *Cntnap1* marker. Data are expressed as mean  $\pm$  SEM. N= 3. Control, animals fed with standard diet and treated with phosphate buffered saline (Veh); CPZ, cuprizone-fed animals; WIN, WIN-55,212-2.
